# Supplementary material
Source: PubMed Central journal article supplement (PMC4505806)
Supplement: NIHMS702761-supplement-Survey.pdf [file NIHMS702761-supplement-Survey.pdf]

## The VTEprophy.com Survey

1. Please describe your surgical practice.

- Academic practice
- Non-academic practice

2. How many surgical procedures do you perform in one year?

- 1-50
- 51-100
- 101-150
- 151-200
- 201-250
- 251-300
- 301-350
- 351-400
- 401-450
- 451-500
- 501 or more

How many of the following surgical procedures do you perform in one year?

3. Combined body contouring procedures (i.e. mastopexy & abdominoplasty)

- 0
- 1-10
- 11-20
- 21-30
- 31-40
- 41-50
- 50+

4. Circumferential lower body lift

- 0
- 1-10
- 11-20
- 21-30
- 31-40
- 41-50
- 50+

5. Abdominoplasty, panniculectomy, and other variants (fleur de lis, etc.)

- 0
- 1-10
- 11-20
- 21-30
- 31-40
- 41-50
- 50+

For patients undergoing body contouring procedures for massive weight loss:

6. Have you ever had a patient with a postoperative deep venous thrombosis?

- Yes
- No

7. Have you ever had a patient with a postoperative pulmonary embolus?

- Yes
- No

8. Have you ever had a patient death secondary to a pulmonary embolism?

- Yes
- No

## The VTEprophy.com Survey

For patients undergoing body contouring procedures for massive weight loss:

9. Which of the following risk factors--when considered alone--would persuade you to use pharmacologic (e.g. heparin, Lovenox) DVT prophylaxis? (Check all that apply)
- |                                                  |                                                                    |
|--------------------------------------------------|--------------------------------------------------------------------|
| <input type="checkbox"/> Age >40 years           | <input type="checkbox"/> Prior personal DVT or PE history          |
| <input type="checkbox"/> Age > 60 years          | <input type="checkbox"/> Family history of DVT or PE               |
| <input type="checkbox"/> Age > 75 years          | <input type="checkbox"/> Recent spinal cord injury (<1 month)      |
| <input type="checkbox"/> Procedures > 45 minutes | <input type="checkbox"/> Recent multi-system trauma (<1 month)     |
| <input type="checkbox"/> Procedures > 4 hours    | <input type="checkbox"/> Lower extremity fracture (<1 month)       |
| <input type="checkbox"/> Obesity                 | <input type="checkbox"/> Recent stroke (<1 month)                  |
| <input type="checkbox"/> Smoking                 | <input type="checkbox"/> Pregnant or post-partum patient           |
| <input type="checkbox"/> Varicose veins          | <input type="checkbox"/> Estrogen/oral contraceptive use           |
| <input type="checkbox"/> Malignancy              | <input type="checkbox"/> I never use pharmacologic DVT prophylaxis |
10. Which of the following best describes your use of pharmacologic DVT prophylaxis?
- Routine [respondent forwarded to question 12]
  - Occasional [respondent forwarded to question 12]
  - Rare [respondent forwarded to question 12]
  - Never [respondent forwarded to question 11]
11. What are the reasons for which you DO NOT routinely use pharmacologic DVT prophylaxis (e.g. heparin)? (Check all that apply)
- |                                                  |                                                                       |
|--------------------------------------------------|-----------------------------------------------------------------------|
| <input type="checkbox"/> Post-operative bleeding | <input type="checkbox"/> Lack of evidence in plastic surgery patients |
| <input type="checkbox"/> Cost                    | <input type="checkbox"/> Other, please specify [write-in allowed]     |
| <input type="checkbox"/> Patient discomfort      |                                                                       |

For patients undergoing body contouring procedures for massive weight loss:

12. Which of the following DVT prophylaxis methods do you use PRE-OPERATIVELY OR INTRA-OPERATIVELY? (Check all that apply)
- |                                              |                                                                    |
|----------------------------------------------|--------------------------------------------------------------------|
| <input type="checkbox"/> Leg elevation       | <input type="checkbox"/> Intermittent pneumatic compression        |
| <input type="checkbox"/> Elastic stockings   | <input type="checkbox"/> Subcutaneous unfractionated heparin       |
| <input type="checkbox"/> IVC filter          | <input type="checkbox"/> Low molecular weight heparin (eg Lovenox) |
| <input type="checkbox"/> Intravenous heparin | <input type="checkbox"/> Oral anticoagulation (eg Coumadin)        |
| <input type="checkbox"/> Dextran             | <input type="checkbox"/> Anti-platelet agents (eg aspirin)         |
13. Which of the following DVT prophylaxis methods do you use POST-OPERATIVELY? (Check all that apply)
- |                                              |                                                                    |
|----------------------------------------------|--------------------------------------------------------------------|
| <input type="checkbox"/> Leg elevation       | <input type="checkbox"/> Intermittent pneumatic compression        |
| <input type="checkbox"/> Elastic stockings   | <input type="checkbox"/> Subcutaneous unfractionated heparin       |
| <input type="checkbox"/> IVC filter          | <input type="checkbox"/> Low molecular weight heparin (eg Lovenox) |
| <input type="checkbox"/> Intravenous heparin | <input type="checkbox"/> Oral anticoagulation (eg Coumadin)        |
| <input type="checkbox"/> Dextran             | <input type="checkbox"/> Anti-platelet agents (eg aspirin)         |

## The VTEprophy.com Survey

14. Which of the following DVT prophylaxis methods do you use AFTER DISCHARGE? (Check all that apply)

- Leg elevation
- Elastic stockings
- IVC filter
- Intravenous heparin
- Dextran
- Intermittent pneumatic compression
- Subcutaneous unfractionated heparin
- Low molecular weight heparin (eg Lovenox)
- Oral anticoagulation (eg Coumadin)
- Anti-platelet agents (eg aspirin)

15. What is your rationale for your preferred method of pharmacologic DVT prophylaxis? (Check all that apply)

- Safe, with few complications
- Effective
- Inexpensive
- Simple to monitor
- Acceptable to patients, nurses, and physicians
- Decreased incidence of venous thromboembolism
- Part of my medical/residency education
- Mandatory under hospital protocol
- I do not use pharmacologic DVT prophylaxis
- Other, please specify [write-in allowed]

WHEN DO YOU INITIATE pharmacologic DVT prophylaxis (i.e. heparin, Lovenox) for the following procedures?

16. Combined body contouring procedures (i.e. mastopexy & abdominoplasty)

- Pre or intra-op
- Post-op
- None used

17. Circumferential lower body lift

- Pre or intra-op
- Post-op
- None used

18. Abdominoplasty, panniculectomy, and other variants (fleur-de-lis, etc.)

- Pre or intra-op
- Post-op
- None used

FOR HOW LONG do you use pharmacologic DVT prophylaxis (i.e. heparin, Lovenox) for the following procedures?

19. Combined body contouring procedures (i.e. mastopexy & abdominoplasty)

- In-hospital only
- After discharge
- None used

## The VTEprophy.com Survey

20. Circumferential lower body lift

- In-hospital only
- After discharge
- None used

21. Abdominoplasty, panniculectomy, and other variants (fleur-de-lis, etc.)

- In-hospital only
- After discharge
- None used

For patients undergoing body contouring procedures for massive weight loss:

22. Do you routinely perform testing to rule out DVT or PE prior to discharge?

- Yes [respondent forwarded to question 23]
- No [respondent forwarded to question 24]

23. What diagnostic tests do you perform?

- Venous duplex scans
- Impedance phlethysmography
- Venogram
- D-dimer
- Spiral CT scan
- VQ scan

For patients undergoing body contouring procedures for massive weight loss:

24. Do you utilize any guidelines for DVT prophylaxis?

- Yes [respondent forwarded to question 25]
- No [respondent forwarded to end of survey]

25. Which guidelines do you use?

- American College of Chest Physicians
- Caprini Risk Assessment Model
- Davison et al: Prevention of VTE in the Plastic Surgery Patient (PRS 2004)
- Institutional guidelines
